# Supplementary material for: Transcriptome Analysis Reveals the Mechanism of Cold-Induced Sweetening in Chestnut during Cold Storage
Source: MDPI journal article supplement (doi:10.3390/foods13172822), 2024-09-05
Supplement: s1 [file foods-3141784 - supplementary.pdf › foods-3141784 - supplementary.pdf]

# Transcriptome analysis reveals the mechanism of cold-induce sweetening in chestnut during cold storage

Chun Zhan <sup>†</sup>, Ruqi Jia <sup>†</sup>, Shuzhen Yang, Meihong Zhang and Litao Peng <sup>\*</sup>

## Supplementary material

**Table S1.** Primers of target gene for qPCR

| Gene ID    | Forward Primer (5'-3') | Reverse Primer (5'-3') |
|------------|------------------------|------------------------|
| CMV_010876 | TGCTGGAACCTCGCTTGTTTC  | CGAGCAAGGTGACGATTGAG   |
| CMV_003994 | AAGTTGGGTTCCTGTTGAC    | TAAATTTTGCCACACCCCGG   |
| CMV_001728 | TCCAACCTAAGGTGGTGGCT   | CCATTGCAAGGCGGTATTCA   |
| CMV_004905 | GCTTCTGATGCCGGTAAACA   | TGAAGGAAAACGTGGCATCG   |
| CMV_001080 | TCGGTGCCTTCCAGTGTTAT   | CATCTGCGAGTACCAGCCT    |
| CMV_019180 | ACTGCTGAACTTCTCTGGCT   | CAATCCCAAGGTTCGCAAT    |
| CMV_005529 | CACCAAAGCATATGAGGCCC   | TCTGGGATGCAGAGAGTTGG   |
| CMV_005375 | TGCCCCTGAAACCCCTTATT   | AGAAATGTCTCGAGGGTGCA   |
| CMV_015650 | CCTTCGTGGCATCCTCTACT   | TACACCAGCCCGAAAGTCAT   |
| CMV_011669 | ACTGCAGGCTGTGACATACT   | ACCCTGTACCTTCACCATGG   |
| Actin      | ATTCACGAGACCACCTACA    | TGCCACAACCTTAATCTTCAT  |

**Table S2.** Changes in starch content of chestnuts during cold storage at 4°C

| Storage time | Amylose (%)            | Amylopectin (%)         | Total starch (%)        |
|--------------|------------------------|-------------------------|-------------------------|
| 1M           | 5.17±0.30 <sup>a</sup> | 39.26±0.58 <sup>a</sup> | 44.43±0.23 <sup>a</sup> |
| 2M           | 4.68±0.33 <sup>c</sup> | 30.82±0.24 <sup>b</sup> | 35.49±0.61 <sup>b</sup> |
| 4M           | 4.92±0.41 <sup>b</sup> | 26.67±0.69 <sup>c</sup> | 31.59±0.47 <sup>c</sup> |

Values are presented as the mean ± SD. Values in a column marked with a, b, c, indicate significant differences between 1M, 2M and 4M samples at the same storage time ( $p < 0.05$ ).

**Table S3.** Summary of transcriptome sequencing results.

| Sample | Total<br>Raw<br>Reads<br>(M) | Total<br>Clean<br>Reads<br>(M) | Total<br>Clean<br>Bases<br>(Gb) | Q20<br>(%) | Q30<br>(%) | Clean<br>Reads<br>Ratio<br>(%) | Total<br>Mapping<br>(%) | Uniquely<br>Mapping<br>(%) |
|--------|------------------------------|--------------------------------|---------------------------------|------------|------------|--------------------------------|-------------------------|----------------------------|
| BL10X1 | 45.57                        | 43.51                          | 6.53                            | 98.19      | 94.8       | 95.47                          | 90.89                   | 63.5                       |
| BL10X2 | 45.57                        | 43.37                          | 6.5                             | 98.28      | 94.92      | 95.16                          | 91.11                   | 65.6                       |
| BL10X3 | 45.57                        | 43.48                          | 6.52                            | 98.3       | 94.94      | 95.41                          | 91.55                   | 66.12                      |
| BL11X1 | 45.57                        | 43.3                           | 6.5                             | 98.27      | 94.86      | 95.01                          | 91.42                   | 67.17                      |
| BL11X2 | 45.57                        | 43.2                           | 6.48                            | 98.26      | 94.85      | 94.78                          | 91.37                   | 67.43                      |
| BL11X3 | 45.57                        | 43.08                          | 6.46                            | 98.27      | 94.86      | 94.52                          | 91.37                   | 67.22                      |
| BL1X1  | 45.57                        | 42.94                          | 6.44                            | 98.27      | 94.9       | 94.22                          | 91.22                   | 66.98                      |
| BL1X2  | 45.57                        | 42.54                          | 6.38                            | 98.31      | 94.98      | 93.34                          | 90.83                   | 67.1                       |
| BL1X3  | 45.57                        | 42.94                          | 6.44                            | 98.37      | 95.16      | 94.23                          | 90.43                   | 66.73                      |

**Table S4.** MYB and AP2-EREBP family differential genes in three three cold storage stages.

| Group     | 1M vs 2M           |                  | 2M vs 4M           |                  | 1M vs 4M           |                  |
|-----------|--------------------|------------------|--------------------|------------------|--------------------|------------------|
|           | Down-<br>regulated | Up-<br>regulated | Down-<br>regulated | Up-<br>regulated | Down-<br>regulated | Up-<br>regulated |
| MYB       | 85                 | 2                | 47                 | 49               | 45                 | 42               |
| AP2-EREBP | 72                 | 1                | 37                 | 48               | 38                 | 44               |

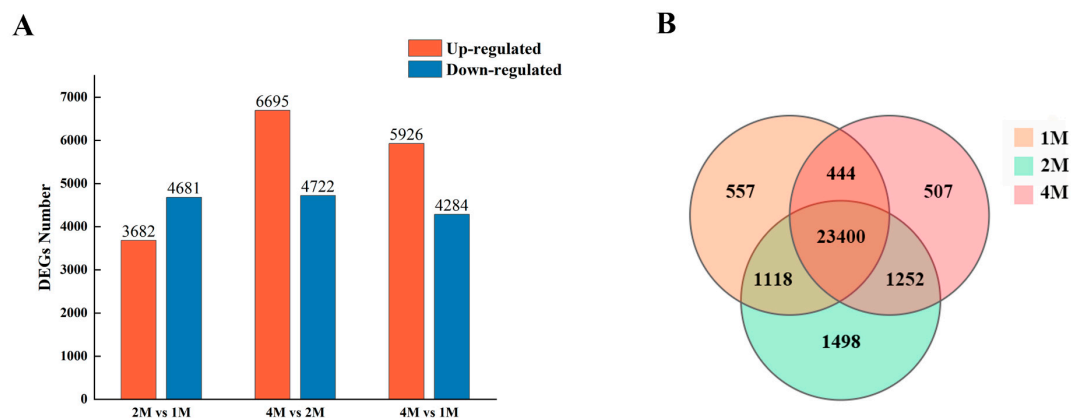

**Fig. S1** Differential gene expression during the cold storage stage of chestnut. (A) Number of differential genes in chestnut between three cold storage time groups. (B) Venn diagram showing the different expressed unigene between treatments with different cold storage times. 1M, 2M and 4M denote the 1st, 2nd and 4th months of chestnut refrigeration, respectively.

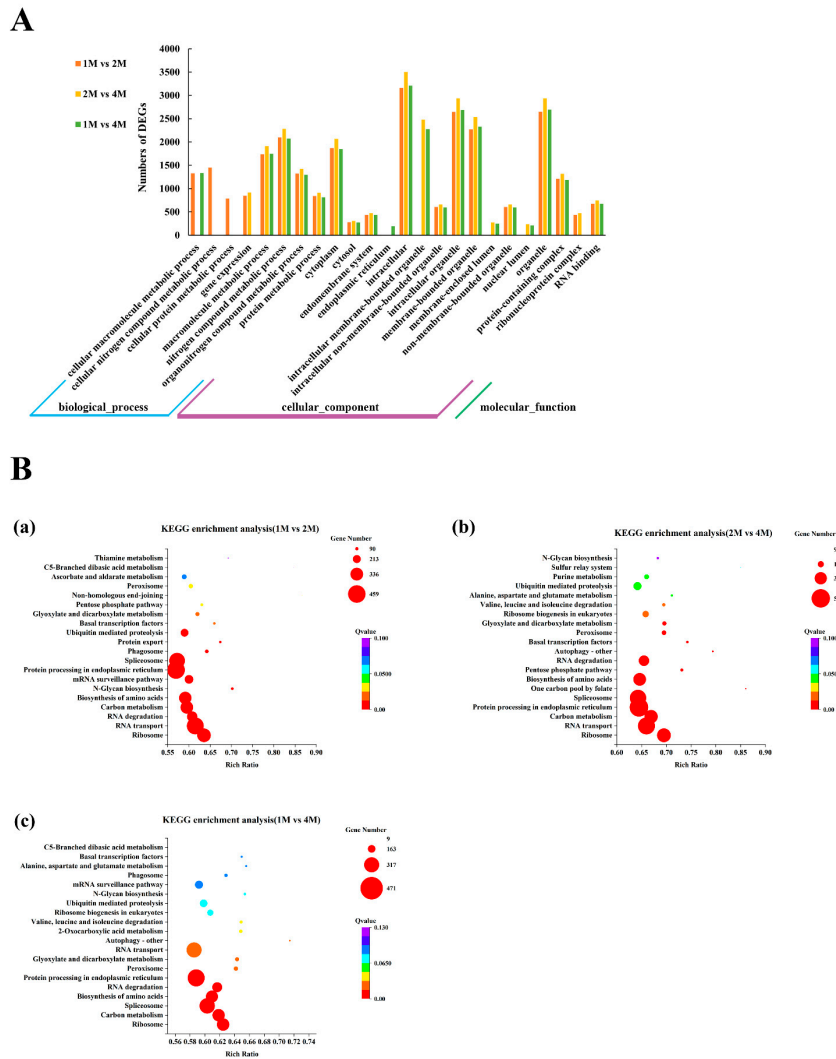

**Fig. S2** GO annotation and KEGG enrichment analysis. (A) The top 20 GO terms for the differentially expressed between 1M vs 2M, 2M vs 4M and 1M vs 4M in chestnut under refrigeration. (B) The top 20 KEGG pathways for the differentially expressed between 1M vs 2M, 2M vs 4M and 1M vs 4M in chestnut under refrigeration: (a) KEGG pathway enrichment analysis of DEGs between 1M and 2M; (b) KEGG pathway enrichment analysis of DEGs between 2M and 4M; (c) KEGG pathway enrichment analysis of DEGs between 1M and 4M.

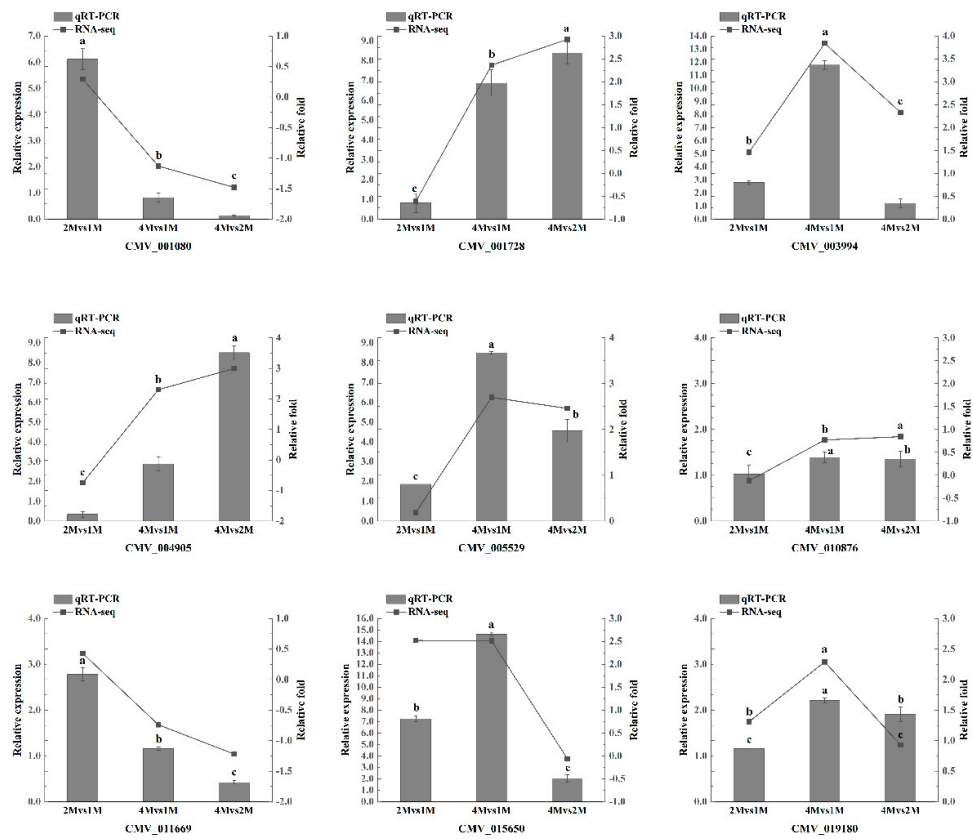

**Fig. S3** Validation of the expression patterns of differentially expressed genes (DEGs) selected from the RNA-seq analysis by qRT-PCR. Values in a column marked with a, b, c, indicate significant differences between 1M, 2M and 4M groups at the same storage time ( $p < 0.05$ ). 1M, 2M and 4M denote the 1st, 2nd and 4th months of chestnut refrigeration, respectively.
